# Supplementary material for: Mesoporous silica coating on hierarchical flowerlike Fe2O3 with enhanced catalytic activity for Fenton-like reaction
Source: Royal Society of Chemistry journal article supplement (doi:10.1039/c6ra15092f), 2016-01-01
Supplement: c6ra15092f1.pdf [file c6ra15092f1.pdf]

## Mesoporous silica coating on hierarchical flowerlike Fe<sub>2</sub>O<sub>3</sub> for catalytic activity enhancement to Fenton-like reaction

Zhi-Min Cui,<sup>a\*</sup> Jing Hao<sup>a</sup>, Jian Liu<sup>b</sup>, and Wei-Guo Song<sup>b\*</sup>

<sup>a</sup> Key Laboratory of Bio-Inspired Smart Interfacial Science and Technology of Ministry of Education, School of Chemistry and Environment, Beihang University, Beijing 100191, PR China, E-mail: cuizhm@iccas.ac.cn

<sup>b</sup> National laboratory for Molecular Science, Institute of Chemistry, Chinese Academy of Sciences, Beijing 100190, P. R. China, E-mail:wsong@iccas.ac.cn

### 1. Experimental Details

#### 1.1 Materials and Reagents:

Ethylene glycol (EG), NH<sub>3</sub>·H<sub>2</sub>O (25 wt%), Tetrabutylammonium bromide (TBAB), Tetraethyl orthosilicate (TEOS), Ethanol, Methanol, Cetyltrimethylammonium bromide (CTAB), FeCl<sub>3</sub>·6H<sub>2</sub>O, H<sub>2</sub>O<sub>2</sub>, urea, and Methylene Blue were purchased from Beijing Chemical Reagent Co. All chemicals were used as received without further purification.

#### 1.2 Preparation of flowerlike Fe<sub>2</sub>O<sub>3</sub>

Flowerlike Fe<sub>2</sub>O<sub>3</sub> were synthesized according to the method developed in our group. In a typical process, 1.2 g FeCl<sub>3</sub>·6H<sub>2</sub>O, 2.7 g urea, and 7.2 g tetrabutylammonium bromide were added to 180 mL ethylene glycol in a 250 mL round flask and then the mixture was heated at 195 °C for 0.5 h. The green Fe<sub>2</sub>O<sub>3</sub> precursor precipitate was

collected by centrifugation and washed with ethanol four times. The  $\text{Fe}_2\text{O}_3$  precursor was calcined in air at 500 °C for 2 h to obtain crystalline  $\text{Fe}_2\text{O}_3$ .

### **1.3 Preparation of $\text{Fe}_2\text{O}_3$ @meso- $\text{SiO}_2$ composite**

Typically, 0.2 g  $\text{Fe}_2\text{O}_3$  precursor was dispersed in 70 mL mixture solution of  $\text{H}_2\text{O}$  and EtOH (4:3, V/V). Then 0.14 g CTAB, 0.56 g  $\text{NH}_3\cdot\text{H}_2\text{O}$  was added to the solution. Finally, 0.2 mL TEOS was added to the solution under stirring and reacted for 6 h. The precipitate was collected by centrifugation and washed with ethanol four times. The solid was calcined in air at 500 °C for 2 h to obtain  $\text{Fe}_2\text{O}_3$ @meso- $\text{SiO}_2$  composite.

### **1.4 Characterization**

The powder XRD pattern was recorded on Rigaku D/MAX-2500V (Cu  $\text{K}\alpha$  radiation). Scanning electron microscopy (SEM) images were obtained on JEOL-6701F scanning electron microscope at 10.0 kV. Transmission electron microscopy (TEM) was carried out on a JEOL 1011F electron microscope running at 100 kV while high resolution (HR) TEM image and energy dispersive absorption X-ray (EDAX) spectroscopy were acquired from JEOL 2010F electron microscope with an energy dispersive X-ray system operated at 200 kV. The UV-Vis Spectra was conducted on Shimadzu UV-2700 and the photoluminescence spectra was obtained on Shimadzu RF-6000 at room temperature.

### **1.5 Measurement of catalytic activity**

In a typical run, the reaction suspension was prepared by adding a given amount of catalyst with equivalent  $\text{Fe}_2\text{O}_3$  (10.0 mg  $\text{Fe}_2\text{O}_3$  or 14.0 mg  $\text{Fe}_2\text{O}_3$ @meso- $\text{SiO}_2$ ) to a 50 mL beaker containing 20ml MB solution (50ppm). Prior to reaction, suspension was

sonicated for 5 min and magnetically stirred in the dark for 60 min to establish the adsorption/desorption equilibrium. Fenton-like reaction was initiated by adding a known concentration of H<sub>2</sub>O<sub>2</sub> (0.6 mL, 30 wt %) to the solution. Samplings were taken at a given time intervals during the reaction. The sample was separated quickly by centrifugation and 150 μL of them was diluted to 3 mL for the further Uv-Vis detection. The catalyst was recovered from the solution by centrifugation and washed with water for 3 times for the next run of Fenton-like reaction. ·OH radicals concentration was determined by the terephthalic acid (TA) fluorescence method. The experimental procedure was similar to the measurement of Fenton catalytic activity except that the MB aqueous solution was replaced by terephthalic acid ( $5 \times 10^{-4}$  mol L<sup>-1</sup>) aqueous NaOH solution ( $2 \times 10^{-3}$  mol L<sup>-1</sup>). The photoluminescence spectra (PL) of TA samples were obtained using a fluorescence spectrophotometer at room temperature, and a wavelength excitation of 325 nm.

#### Supporting Figures

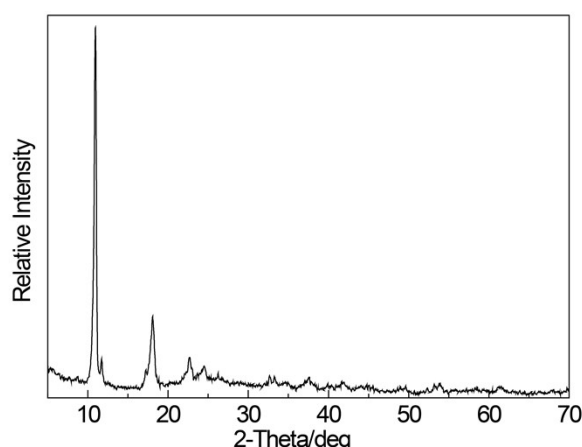

Figure S1 XRD pattern of the as-synthesized Fe<sub>2</sub>O<sub>3</sub> precursor

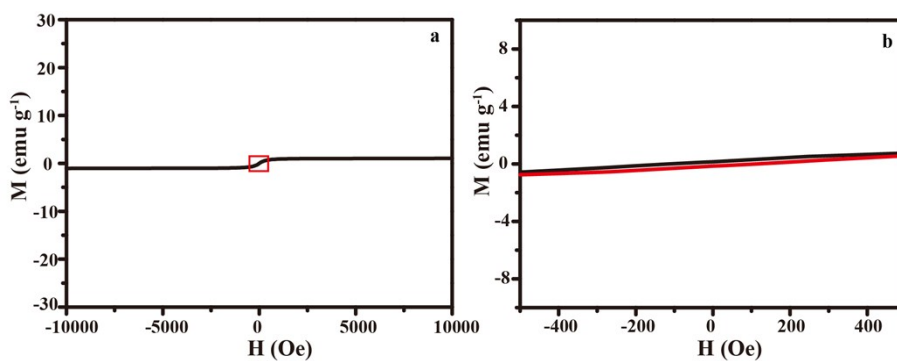

Figure S2. a) the room-temperature hysteresis curves of the flowerlike  $\alpha$ -Fe<sub>2</sub>O<sub>3</sub>, b) is the enlarged view around H = 0 region.

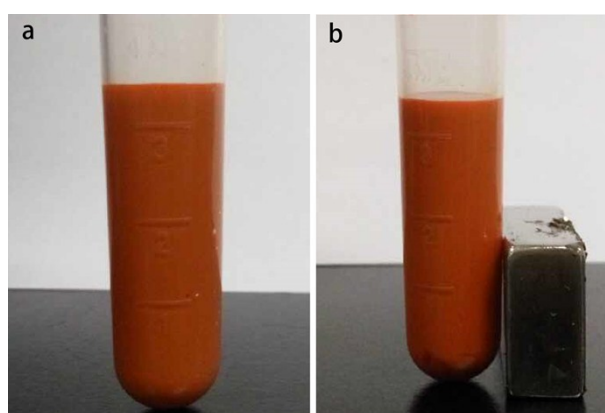

Figure S3. The digital photo of the Fe<sub>2</sub>O<sub>3</sub>@mesoporous silica composite catalyst after one cycle Fenton-like reaction (a) and then was put in the magnetic field (b).

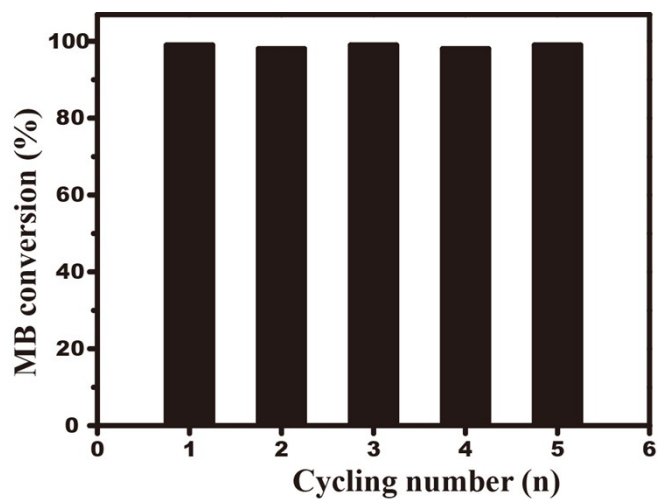

Figure S4. The cycling performance of flowerlike Fe<sub>2</sub>O<sub>3</sub>@mesoporous silica composite as catalyst for Fenton-like reaction to the degradation of MB

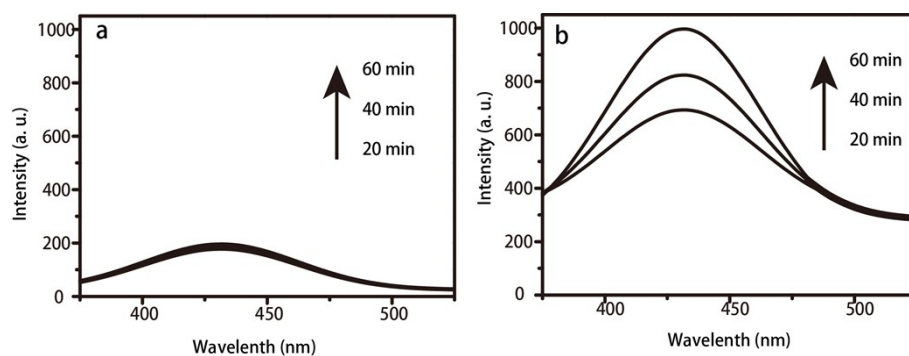

Figure S5. Total concentrations of  $\cdot\text{OH}$  radicals formed as a function of time on flowerlike  $\text{Fe}_2\text{O}_3$  (a) and  $\text{Fe}_2\text{O}_3@\text{meso-SiO}_2$  composite (b), the reaction condition is similar with the degradation of MB except that the MB aqueous solution was replaced by  $5 \times 10^{-4} \text{ mol L}^{-1}$  terephthalic acid aqueous solution with a concentration of  $2 \times 10^{-3} \text{ mol L}^{-1}$  NaOH
